# Supplementary material for: Mixed Th1 and Th2 Mycobacterium tuberculosis-specific CD4 T cell responses in patients with active pulmonary tuberculosis from Tanzania
Source: PubMed Central journal article supplement (PMC5552332; doi:10.1371/journal.pntd.0005817), 2017-07-31

# Supplemental Figure 6

A

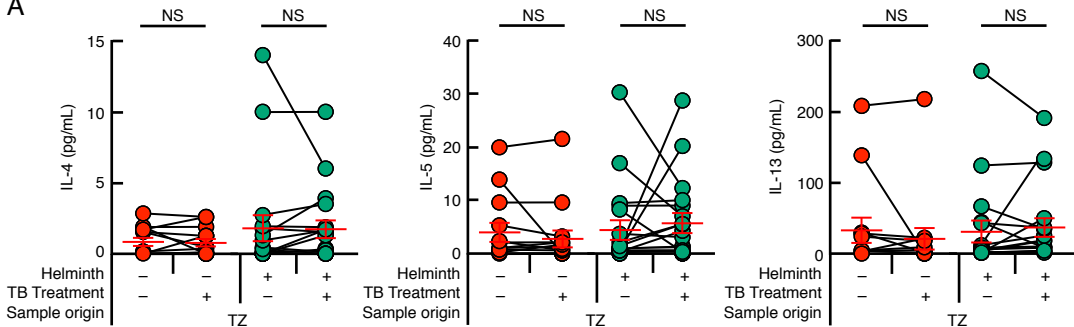

B

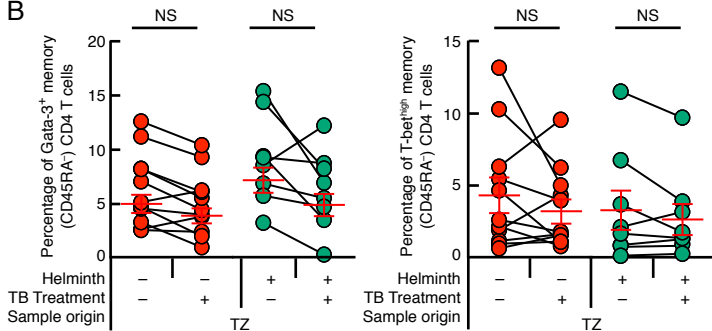

Supplement: pntd.0005817.s006.pdf [file pntd.0005817.s006.pdf]
